# Supplementary material
Source: publisher figshare collection journal article supplement (https://acs.figshare.com/ndownloader/files/6601380)
Supplement: Supplementary file 1 [file 6601380]

Compound	SMILES	BAZ2B IC50 (μM)	LE	PDB code
1	Cc1c(cccn1)NC(C)CS(=O)(=O)C	>500	<0.30	5L96
2	Cc1c(cccn1)NC2CCCS(=O)(=O)C2	279	0.31	5L8T
3	Cc1c(cccn1)NC2CCCC2S(=O)(=O)C	>1000	<0.24	5L97
4	Cc1c(cccn1)NC(C)c2cc3c(ccs3)nc2	490	0.23	5L98
5	Cc1c(cccn1)NC(C)c2ccc3c(c2)OCCO3	ND	ND	5L8U
6	Cc1c(cccn1)NC(C)c2ccc3c(c2)OCCCO3	481	0.24	5L99
